# Supplementary material
Source: PubMed Central journal article supplement (PMC5728143)
Supplement: ba006684-suppl1.pdf [file ba006684-suppl1.pdf]

## Supplemental Data

The supplemental data have been provided by the authors to give readers additional information about their work.

Supplement to M. Shima, H. Hanabusa, M. Taki, et al. Long-term safety and efficacy of emicizumab in a phase 1/2 study in hemophilia A patients with or without inhibitors.

## Supplementary Appendix

Midori Shima,<sup>1</sup> Hideji Hanabusa,<sup>2</sup> Masashi Taki,<sup>3</sup> Tadashi Matsushita,<sup>4</sup> Tetsuji Sato,<sup>5</sup> Katsuyuki Fukutake,<sup>6</sup> Ryu Kasai,<sup>7</sup> Koichiro Yoneyama,<sup>7</sup> Hiroki Yoshida,<sup>7</sup> and Keiji Nogami<sup>1</sup>

<sup>1</sup>Department of Pediatrics, Nara Medical University, Kashihara, Nara, Japan; <sup>2</sup>Department of Hematology, Ogikubo Hospital, Tokyo, Japan; <sup>3</sup>Department of Pediatrics, St. Marianna University School of Medicine, Kawasaki, Japan; <sup>4</sup>Department of Transfusion Medicine, Nagoya University, Nagoya, Japan; <sup>5</sup>Department of Pediatrics, University of Occupational and Environmental Health, Kitakyushu, Japan; <sup>6</sup>Department of Laboratory Medicine, Tokyo Medical University, Tokyo, Japan; and <sup>7</sup>Chugai Pharmaceutical Co., Ltd., Tokyo, Japan

## **Supplemental Methods**

Criteria for the extended administration starting dosage are as follows:

- For subjects in whom bleeding episodes required coagulation factor replacement therapy  $\geq 50\%$  less frequently in the phase 1 study (12 weeks) than in the six months before emicizumab treatment, extended treatment was started at the dose administered in the phase 1 study, or at the next dose up.
- For subjects in whom bleeding episodes required coagulation factor replacement therapy  $< 50\%$  less frequently in the phase 1 study (12 weeks) than in the six months before emicizumab treatment, extended treatment was started at the next dose up from that administered in the phase 1 study. However, treatment could not commence until the Efficacy and Safety Evaluation Committee approved escalation to the next dose.

**Supplemental Table S1. AEs related to emicizumab treatment**

| <b>AE, n (%)</b>                          | <b>Patients<br/>(N = 18)</b> |
|-------------------------------------------|------------------------------|
| Total patients with at least 1 related AE | 7 (39.0)                     |
| Total number of related AEs               | 14                           |
| Injection-site AEs                        |                              |
| Injection-site erythema                   | 3 (16.7)                     |
| Injection-site pruritus                   | 3 (16.7)                     |
| Injection-site discomfort                 | 1 (5.6)                      |
| Injection-site pain                       | 1 (5.6)                      |
| Injection-site rash                       | 1 (5.6)                      |
| Malaise                                   | 1 (5.6)                      |
| Diarrhea                                  | 1 (5.6)                      |
| Nausea                                    | 1 (5.6)                      |
| Blood creatinine phosphokinase increased  | 1 (5.6)                      |
| C-reactive protein increased              | 1 (5.6)                      |

All data collected following dose up-titrations were included.

AE, adverse event.

Supplemental Figure S1. Findings of contrast-enhanced abdominal computed tomography (CT) obtained on Day 477 at the diagnosis of hematoma

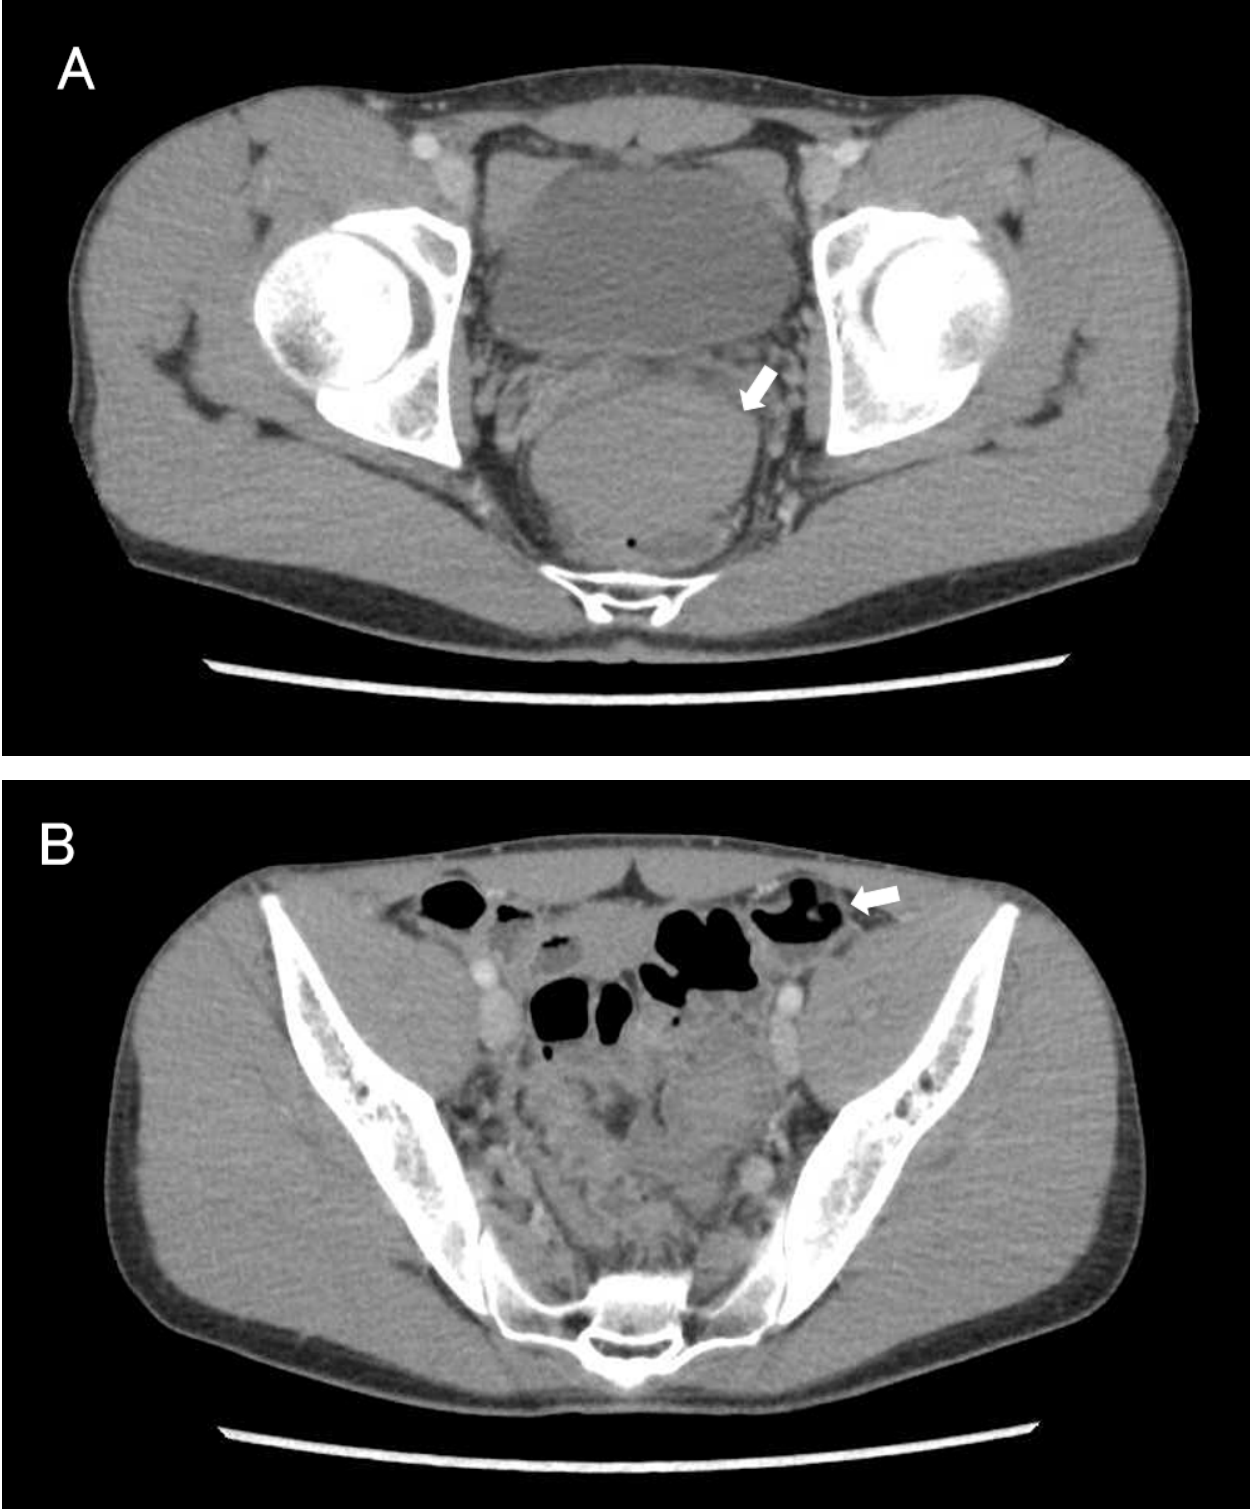

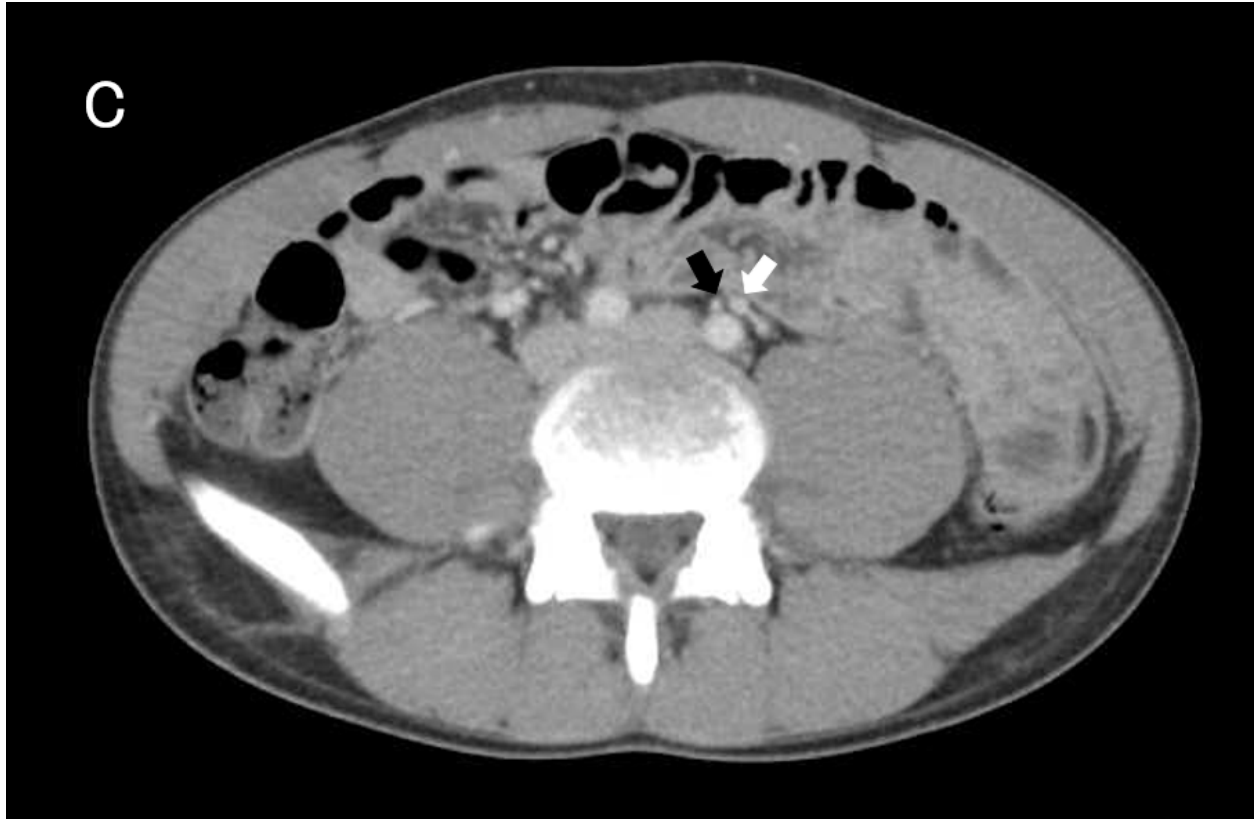

- A. CT showed fluid collection in the pelvic cavity (maximum diameter 6.0 cm; arrow). CT value of fluid collection was as high as  $62 \pm 12.3$  (mean  $\pm$  SD), and a hematoma was diagnosed. There was no change before and after injection of contrast medium, which suggested that there was no active bleeding.
- B. The intestinal wall was well enhanced with no thickening observed, which suggested no evidence of edema and ischemia (arrow).
- C. The inferior mesenteric artery (black arrow) and the inferior mesenteric vein (white arrow) were well enhanced with no obvious thrombus identified.

**Supplemental Figure S2. Individual ABRs (any bleeding site) pre- and post-emicizumab for each patient with or without inhibitors. (A) Cohort 1. (B) Cohort 2. (C) Cohort 3.**

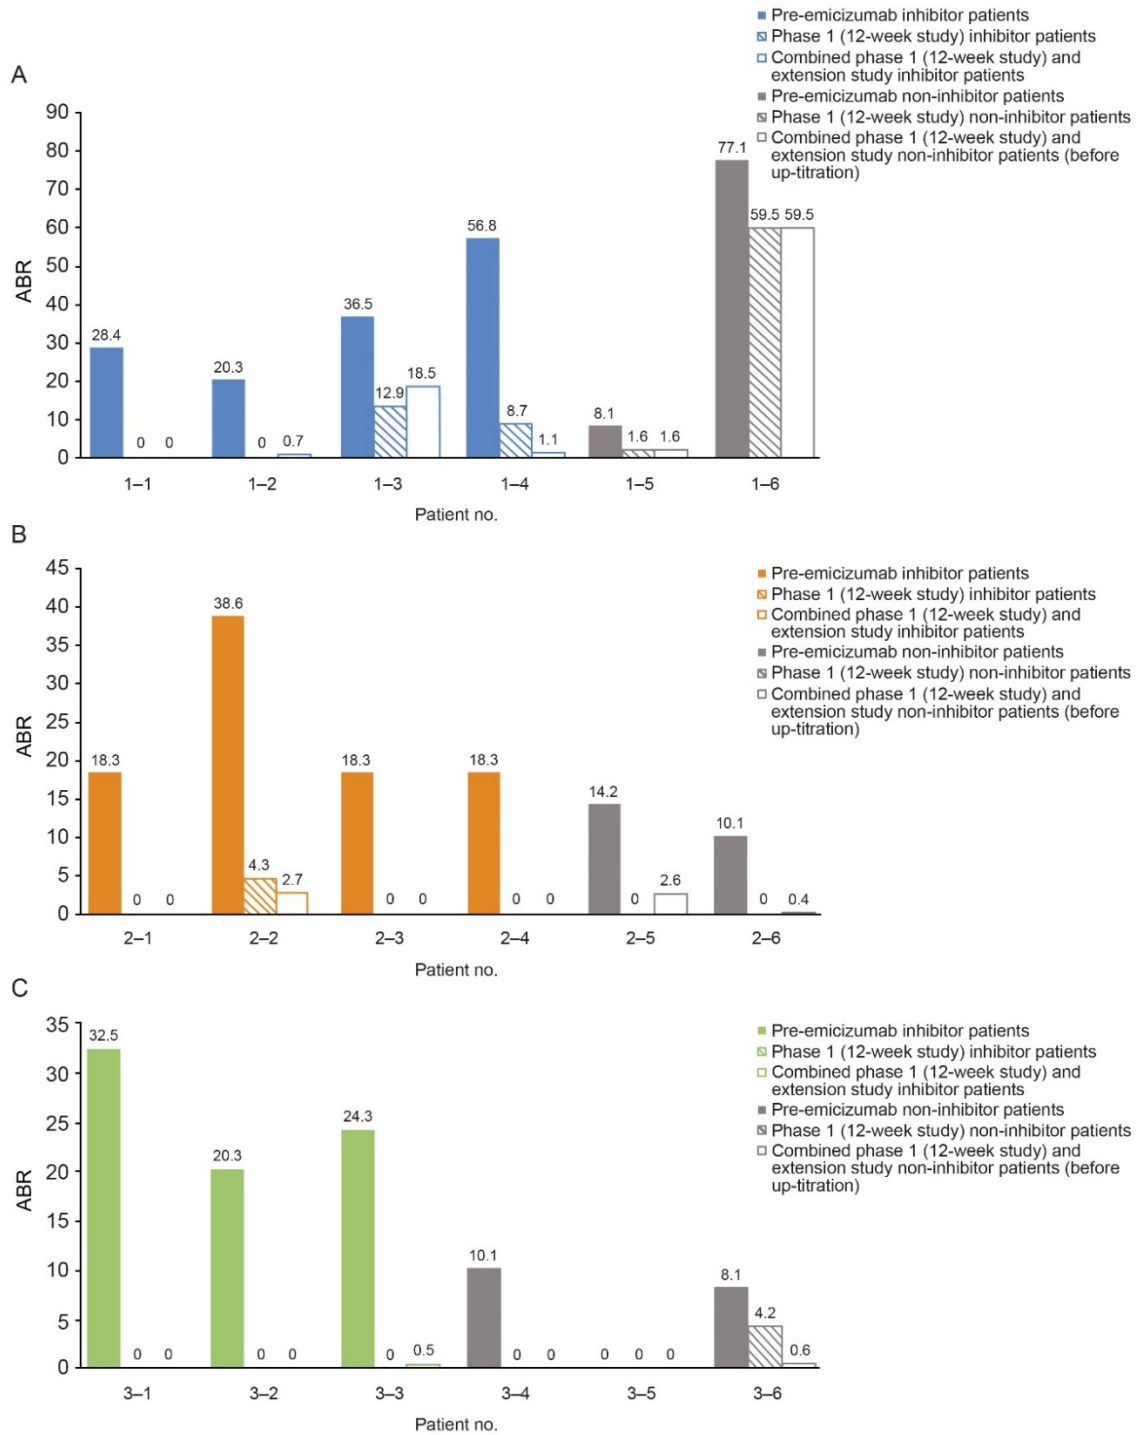

All data collected following dose up-titrations were excluded; data before dose up-titration were used for ABR calculation of the combined phase 1 (12-week) and extension studies.

**Supplemental Figure S3. Individual ABRs (any bleeding site) pre- and post-emicizumab for patients who had dose up-titration.**

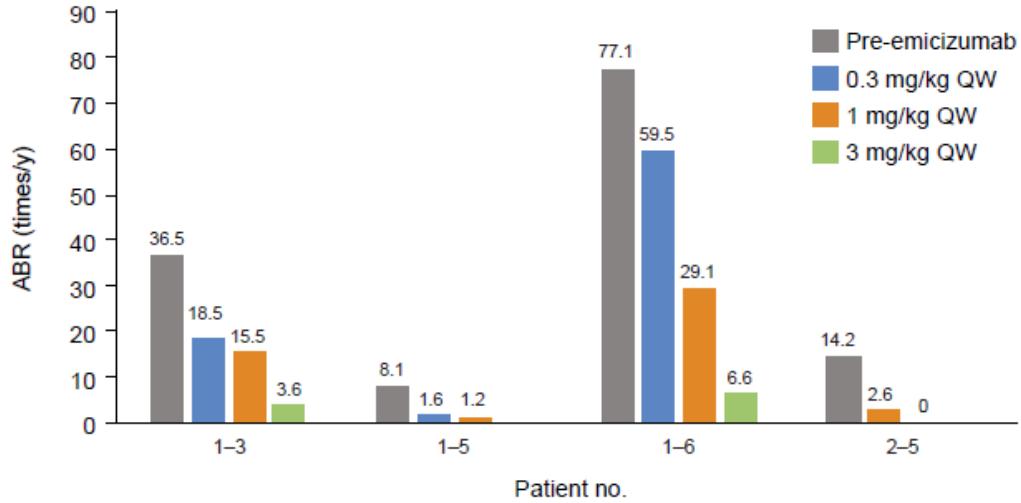

| Dosing       | Weeks to calculate ABR |    |    |    |
|--------------|------------------------|----|----|----|
|              | 45                     | 96 | 12 | –  |
| 0.3 mg/kg QW | 45                     | 96 | 12 | –  |
| 1 mg/kg QW   | 27                     | 44 | 25 | 81 |
| 3 mg/kg QW   | 72                     | –  | 72 | 37 |

ABR, annualized bleeding rate; QW, once weekly.

ABRs for each given dose were calculated based on combined data from the phase 1 (12-week) and extension studies.



**Supplemental Figure S4. Intra-patient mean amounts of coagulation factor required per bleeding event (any bleeding site) pre- and post-emicizumab for each patient. (A) FVIII. (B) aPCC. (C) rFVIIa.**

A

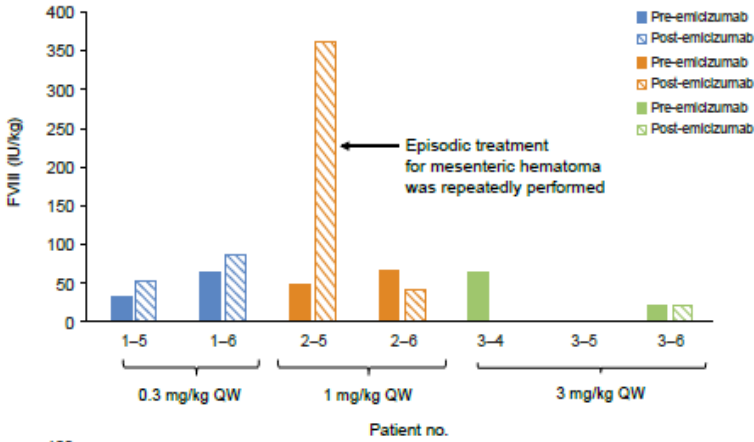

B

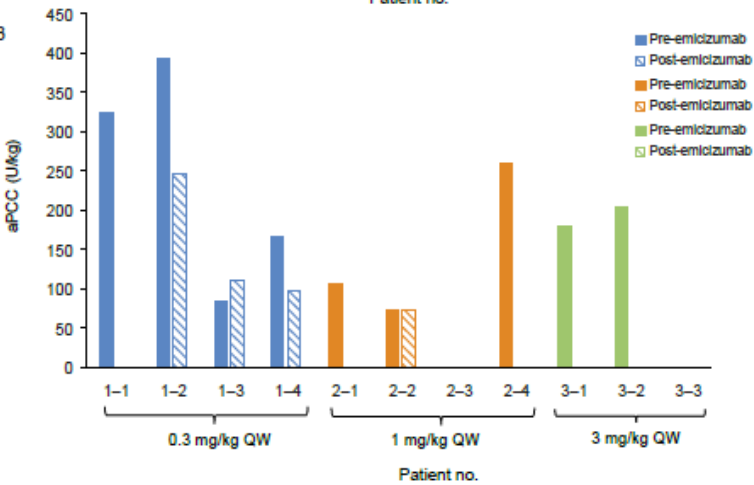

C

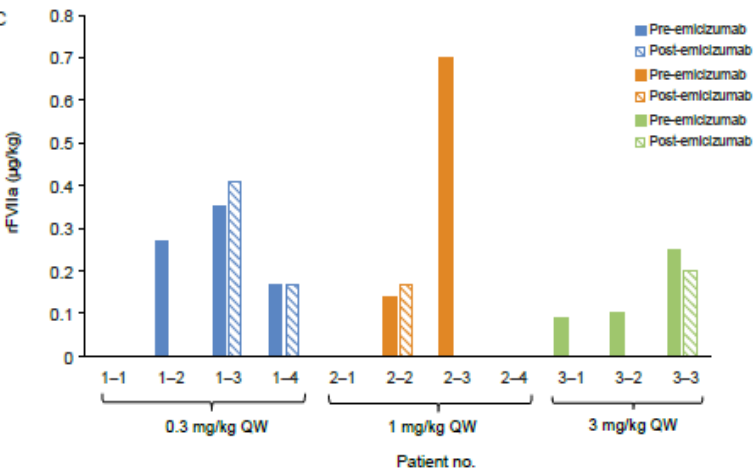

All data collected following dose up-titrations were included. Emicizumab dose indicates the assigned dose for each patient's respective cohort in the 12-week study.
